# Supplementary material for: The Impact of the Animal Housing System on Immune Cell Composition and Function in the Blood of Dromedary Camels
Source: MDPI journal article supplement (doi:10.3390/ani12030317), 2022-01-28
Supplement: s1 [file s1]

*Article*

# The Impact of the Animal Housing System on Immune Cell Composition and Function in the Blood of Dromedary Camels

Jamal Hussen \* and Mohammed Ali Al-Sukruwah

Department of Microbiology, College of Veterinary Medicine, King Faisal University,  
Al-Ahsa 31982, Saudi Arabia; 219028688@student.kfu.edu.sa

\* Correspondence: jhussen@kfu.edu.sa; Tel.: +966-135-896-626

**Citation:** Hussen, J.; Al-Sukruwah, M.A. The Impact of the Animal Housing System on Immune Cell Composition and Function in the Blood of Dromedary Camels. *Animals* **2022**, *12*, 317.  
<https://doi.org/10.3390/ani12030317>

Academic Editors: Maria Giovanna Ciliberti and Mariangela Caroprese

Received: 22 December 2021

Accepted: 24 January 2022

Published: 28 January 2022

**Publisher's Note:** MDPI stays neutral with regard to jurisdictional claims in published maps and institutional affiliations.

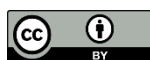

**Copyright:** © 2022 by the authors. Submitted for possible open access publication under the terms and conditions of the Creative Commons Attribution (CC BY) license (<https://creativecommons.org/licenses/by/4.0/>).

**Table S1.** List of antibodies.

| Antigen     | Antibody clone | Labeling | Source       | Isotype     |
|-------------|----------------|----------|--------------|-------------|
| CD14        | CAM36A         | -        | Kingfisher   | Mouse IgG1  |
| CD14        | Tuk4           | APC      | Thermofisher | Mouse IgG2a |
| MHCII       | TH81A5         | -        | Kingfisher   | Mouse IgG2a |
| CD172a      | DH59b          | -        | Kingfisher   | Mouse IgG1  |
| CD163       | LND68A         | -        | Kingfisher   | Mouse IgG1  |
| CD4         | GC50A1         | -        | Xceltis      | Mouse IgM   |
| WC1         | BAQ128A        | -        | Xceltis      | Mouse IgG1  |
| CD11a       | HUH73A         | -        | Kingfisher   | Mouse IgG1  |
| CD18        | 6.7            | FITC     | BD           | Mouse IgG2a |
| CD44        | LT41A          | -        | Kingfisher   | Mouse IgG2a |
| CD45        | LT12A          | -        | Kingfisher   | Mouse IgG2a |
| Mouse IgM   | poly           | APC      | Thermofisher | Goat IgG    |
| Mouse IgG1  | poly           | FITC     | Thermofisher | Goat IgG    |
| Mouse IgG2a | poly           | PE       | Thermofisher | Goat IgG    |

MHC: Major Histocompatibility Complex; WC1: workshopcluster 1; APC: Allophycocyanin; FITC: Fluorescein isothiocyanate; PE: Phycoerythrin; poly: polyclonal.
